# Supplementary material
Source: PubMed Central journal article supplement (PMC4451449)
Supplement: NIHMS650651-supplement-supplement_1.pdf [file NIHMS650651-supplement-supplement_1.pdf]

**Table S1 Primers used in this study****Primers for gene expression**

| <b>Genes</b> | <b>5' primer</b>     | <b>3' primer</b>         |
|--------------|----------------------|--------------------------|
| <i>DNMT1</i> | TTCTTCGCAGAGCAAATTGA | TGCCACCAAATTTAACCATGT    |
| <i>TET1</i>  | CCCGGGCTCCAAAGTTGTG  | GCAGGAAACAGAGTCATTGGTCCT |
| <i>GAPDH</i> | CGAGATCCCTCCAAAATCAA | TTCACACCCATGACGAACAT     |
| <i>ACTB</i>  | TCCCTGGAGAAGAGCTACGA | TGAAGGTAGTTTCGTGGATGC    |
| <i>ENO2</i>  | TGTCTCTGGCCGTGTGTAAG | GCATGAGAGCCACCATTGAT     |

**Primers for ChIP assay**

| <b>Genes</b>                 | <b>5' primer</b>           | <b>3' primer</b>         |
|------------------------------|----------------------------|--------------------------|
| <i>RELN</i> (-220 to +70)    | CCGGGACACGTGTGGCGGCG       | GGCGAGAAGAAGGCCGGACGGG   |
| <i>GAD1</i> (-55 to +121)    | GCGTGTTGAGTACGTTCTGGATTACT | GGAAATCACGAGGCCGTTGCT    |
| <i>BDNF</i> (-730 to -537)   | GACCTCTTCGCTTCCAGCTTG      | TGCTGCTCGGTGCTGCTT       |
| <i>GAD2</i> (-1507 to -1310) | GCCTGGAACAGACTTCACCTAG     | CTGTCCCTGGTCAATTCTCTCCAC |
| <i>GAPDH</i> (-122 to +42)   | CGGCTACTAGCGGTTTTACG       | AGGAGGAGCAGAGAGCGAAG     |
